# Supplementary material for: Enhanced CO adsorption on α-graphyne-supported and defective graphene-supported Cu19clusters and a modified induction energy model
Source: Royal Society of Chemistry journal article supplement (doi:10.1039/d3cp03164k), 2023-01-01
Supplement: d3cp03164k1.pdf [file d3cp03164k1.pdf]

**Supplementary information**

**Enhanced CO adsorption on  $\alpha$ -graphyne-supported and defective  
graphene-supported Cu<sub>19</sub> clusters and modified induction energy  
model**

Delu Gao, Naigui Liu, Dunyou Wang\*

*College of Physics and Electronics, Shandong Normal University, Jinan 250014 ,*

*Shandong , China*

\*Corresponding Author. Electronic mail: [dywang@sdu.edu.cn](mailto:dywang@sdu.edu.cn)

**Table S1.** Bader charge ( $e^-$ ) distribution for each Cu atom of Cu<sub>19</sub> in Cu<sub>19</sub>/αGY and Cu<sub>19</sub>/G. The “-” indicates charge transfer from Cu<sub>19</sub> to α-graphyne and defective graphene in Cu<sub>19</sub>/αGY and Cu<sub>19</sub>/G relative to the pure Cu<sub>19</sub> cluster.

| Atom  | Charge transfer to Cu <sub>19</sub> /αGY | Charge transfer of Cu <sub>19</sub> /G |
|-------|------------------------------------------|----------------------------------------|
| Cu-1  | -0.012                                   | 0.013                                  |
| Cu-2  | 0.018                                    | 0.023                                  |
| Cu-3  | -0.008                                   | -0.006                                 |
| Cu-4  | -0.007                                   | 0.022                                  |
| Cu-5  | 0.022                                    | 0.019                                  |
| Cu-6  | 0.002                                    | 0.003                                  |
| Cu-7  | -0.010                                   | -0.036                                 |
| Cu-8  | 0.027                                    | 0.010                                  |
| Cu-9  | -0.001                                   | 0.013                                  |
| Cu-10 | -0.001                                   | 0.003                                  |
| Cu-11 | 0.019                                    | 0.014                                  |
| Cu-12 | -0.011                                   | -0.018                                 |
| Cu-13 | 0.006                                    | -0.042                                 |
| Cu-14 | -0.193                                   | -0.203                                 |
| Cu-15 | -0.219                                   | -0.195                                 |
| Cu-16 | -0.210                                   | -0.161                                 |
| Cu-17 | -0.233                                   | -0.202                                 |
| Cu-18 | -0.206                                   | -0.212                                 |
| Cu-19 | -0.121                                   | -0.534                                 |
| Total | -1.14                                    | -1.49                                  |

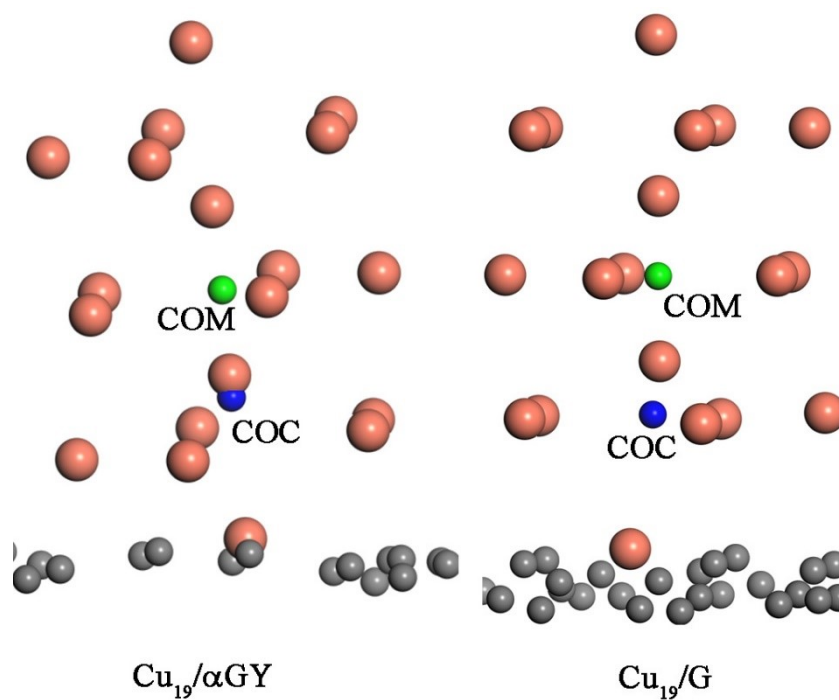

**Fig. S1.** The center of charge and the center of mass of  $\text{Cu}_{19}$  in  $\text{Cu}_{19}/\alpha\text{GY}$  and  $\text{Cu}_{19}/\text{G}$ .

The green point refers to the center of mass and the blue point refers to the center of charge.

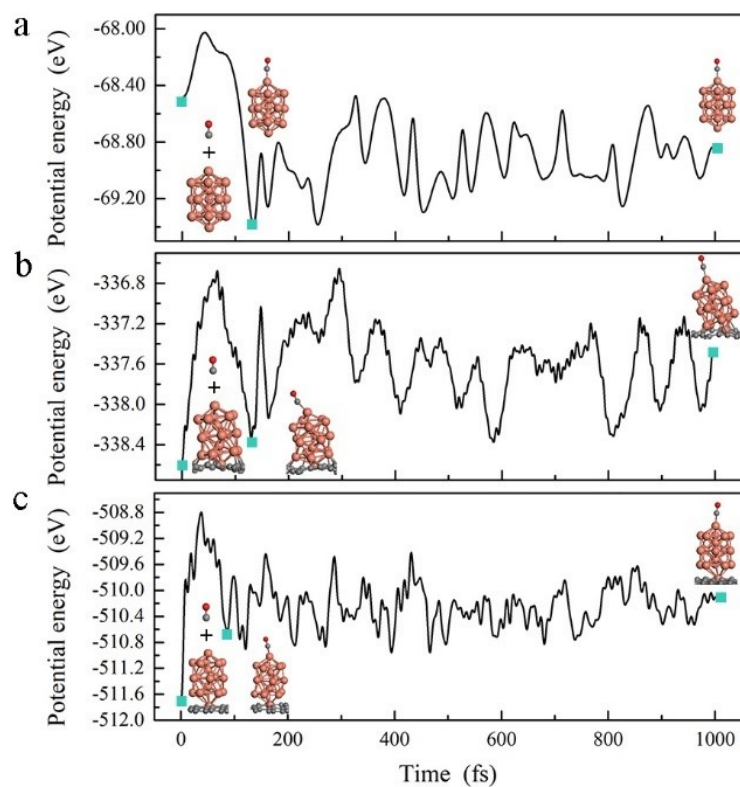

**Fig. S2.** Three representative AIMD trajectories of potential energy versus time for the adsorption of CO on  $\text{Cu}_{19}$ ,  $\text{Cu}_{19}/\alpha\text{GY}$  and  $\text{Cu}_{19}/\text{G}$ . (a)  $\text{Cu}_{19}$ . (b)  $\text{Cu}_{19}/\alpha\text{GY}$ . (c)  $\text{Cu}_{19}/\text{G}$ . First, CO molecule comes in from the asymptotic region at about 7.5 Å above the substrate to attack the cluster, and is adsorbed on the adsorption site at about 100 fs. Then the AIMD trajectories show the systems evolve to stabilize at about 800 fs. The adsorption states then are obtained by optimizing the final stable structures of the entire system identified from the AIMD trajectories.

**Table S2.** ICOHP values and adsorption energies (in eV) for all adsorption sites of COadsorption on Cu<sub>19</sub>, Cu<sub>19</sub>/αGY and Cu<sub>19</sub>/G.

| Adsorption sites |          | ICOHP | $E^{ad}$ |
|------------------|----------|-------|----------|
|                  | T1       | -2.04 | -1.35    |
|                  | T2       | -1.74 | -1.17    |
|                  | T3       | -1.59 | -1.01    |
| Top              | T1/αGY   | -2.42 | -1.34    |
|                  | T2-1/αGY | -2.29 | -1.32    |
|                  | T2-2/αGY | -2.24 | -1.41    |
|                  | T3/αGY   | -2.11 | -1.28    |
|                  | T1/G     | -2.75 | -1.54    |
|                  | T2-1/G   | -2.53 | -1.34    |
|                  | T2-2/G   | -2.56 | -1.40    |
|                  | T3/G     | -2.36 | -1.40    |
|                  | B1       | -2.75 | -0.96    |
|                  | B2       | -2.69 | -0.97    |
| Bridge           | B1/αGY   | -3.65 | -1.16    |
|                  | B1-1/G   | -3.91 | -1.37    |
|                  | B1-2/G   | -4.15 | -1.40    |
|                  | H1       | -3.50 | -0.89    |
| Hollow           | H1/αGY   | -4.86 | -1.25    |
|                  | H1/G     | -5.38 | -1.43    |

**Table S3.** The values ( $\text{\AA}$ ) of  $R_{cont}$ ,  $R_{co}$  and  $r_{core}$  and the induction energy  $V_{ind}(R_{eff})$  (eV) on  $\text{Cu}_{19}/\alpha\text{GY}$  and  $\text{Cu}_{19}/\text{G}$  for the modified induction energy model.

| Adsorption state                 | $R_{cont}$                   | $R_{co}$ | $r_{core}$ | $V_{ind}(R_{eff})$ |       |
|----------------------------------|------------------------------|----------|------------|--------------------|-------|
| $\text{Cu}_{19}/\alpha\text{GY}$ | T1(T1/G)                     | 5.06     | 7.54       | 4.34               | -0.18 |
|                                  | T2(T2-1/ $\alpha\text{GY}$ ) | 4.20     | 6.29       | 2.79               | -0.12 |
|                                  | T2(T2-2/ $\alpha\text{GY}$ ) | 2.67     | 5.13       | 2.32               | -0.29 |
|                                  | T3(T3/ $\alpha\text{GY}$ )   | 2.69     | 5.03       | 2.26               | -0.31 |
|                                  | B1(B1/ $\alpha\text{GY}$ )   | 2.82     | 5.18       | 2.44               | -0.33 |
|                                  | H1(H1/ $\alpha\text{GY}$ )   | 2.74     | 5.24       | 2.42               | -0.29 |
| $\text{Cu}_{19}/\text{G}$        | T1(T1/G)                     | 5.39     | 7.85       | 4.63               | -0.30 |
|                                  | T2(T2-1/G)                   | 4.66     | 6.53       | 3.22               | -0.26 |
|                                  | T2(T2-2/G)                   | 2.77     | 5.19       | 2.34               | -0.48 |
|                                  | T3(T3/G)                     | 2.93     | 5.01       | 2.23               | -0.55 |
|                                  | B1(B1-1/G)                   | 3.09     | 5.40       | 2.40               | -0.39 |
|                                  | B1(B1-2/G)                   | 2.21     | 4.28       | 0.82               | -0.20 |
|                                  | H1(H1/G)                     | 2.86     | 5.39       | 2.48               | -0.44 |

**Table S4.** The predicted adsorption energy  $E_{supp}^{pred}$  of  $\text{Cu}_{19}$  supported by  $\alpha$ -graphyne and

defective graphene calculated using our original induction energy model.  $E_{Cu_{19}}^{ad}$  is the adsorption energy of  $Cu_{19}$ , and  $E_{supp}^{ad}$  is the adsorption energy on  $Cu_{19}/\alpha GY$  or  $Cu_{19}/G$ . The parameters of  $R_{cont}$ ,  $R_{cc}$  and  $r_{core}$  to calculate  $V_{ind}(R_{eff})$  are presented in Table S5. The units of adsorption energies are in eV.

| Adsorption state    | $E_{Cu_{19}}^{ad}$     | $V_{ind}(R_{eff})$ | $E_{supp}^{pred}$ | $E_{supp}^{ad}$ | Error |       |
|---------------------|------------------------|--------------------|-------------------|-----------------|-------|-------|
| $Cu_{19}/\alpha GY$ | T1(T1/ $\alpha GY$ )   | -1.35              | -0.26             | -1.61           | -1.34 | -0.27 |
|                     | T2(T2-1/ $\alpha GY$ ) | -1.17              | -0.28             | -1.45           | -1.32 | -0.13 |
|                     | T2(T2-2/ $\alpha GY$ ) | -1.17              | -0.24             | -1.41           | -1.41 | 0.00  |
|                     | T3(T3/ $\alpha GY$ )   | -1.01              | -0.19             | -1.2            | -1.28 | 0.08  |
|                     | B1(B1/ $\alpha GY$ )   | -0.97              | -0.18             | -1.15           | -1.16 | -0.01 |
|                     | H1(H1/ $\alpha GY$ )   | -0.89              | -0.19             | -1.08           | -1.25 | 0.17  |
|                     | MSE                    |                    |                   |                 |       | -0.03 |
| MUE                 |                        |                    |                   |                 | 0.11  |       |
| $Cu_{19}/G$         | T1(T1/G)               | -1.35              | -0.46             | -1.81           | -1.54 | -0.27 |
|                     | T2(T2-1/G)             | -1.17              | -0.49             | -1.66           | -1.34 | -0.32 |
|                     | T2(T2-2/G)             | -1.17              | -0.60             | -1.77           | -1.40 | -0.37 |
|                     | T3(T3/G)               | -1.01              | -0.30             | -1.31           | -1.40 | 0.09  |
|                     | B1(B1-1/G)             | -0.97              | -0.50             | -1.47           | -1.37 | -0.10 |
|                     | B1(B1-2/G)             | -0.97              | -0.49             | -1.46           | -1.40 | -0.06 |
|                     | H1(H1/G)               | -0.89              | -0.49             | -1.38           | -1.43 | 0.05  |
| MSE                 |                        |                    |                   |                 | -0.14 |       |
| MUE                 |                        |                    |                   |                 | 0.18  |       |

**Table S5.** The values ( $\text{\AA}$ ) of  $R_{cont}$ ,  $R_{cc}$  and  $r_{core}$  and the induction energy  $V_{ind}(R_{eff})$

(eV) on  $\text{Cu}_{19}/\alpha\text{GY}$  and  $\text{Cu}_{19}/\text{G}$  for the original induction energy model.

| Adsorption state                 |                              | $R_{cont}$ | $R_{cc}$ | $r_{core}$ | $V_{ind}(R_{eff})$ |
|----------------------------------|------------------------------|------------|----------|------------|--------------------|
| $\text{Cu}_{19}/\alpha\text{GY}$ | T1(T1/ $\alpha\text{GY}$ )   | 3.61       | 6.08     | 3.19       | -0.26              |
|                                  | T2(T2-1/ $\alpha\text{GY}$ ) | 3.04       | 5.37     | 2.50       | -0.28              |
|                                  | T2(T2-2/ $\alpha\text{GY}$ ) | 2.91       | 5.29     | 2.34       | -0.24              |
|                                  | T3(T3/ $\alpha\text{GY}$ )   | 2.29       | 4.76     | 1.54       | -0.19              |
|                                  | B1(B1/ $\alpha\text{GY}$ )   | 2.13       | 4.46     | 1.25       | -0.18              |
|                                  | H1(H1/ $\alpha\text{GY}$ )   | 2.19       | 4.34     | 1.23       | -0.19              |
| $\text{Cu}_{19}/\text{G}$        | T1(T1/G)                     | 3.41       | 5.86     | 2.99       | -0.46              |
|                                  | T2(T2-1/G)                   | 2.83       | 5.24     | 2.39       | -0.49              |
|                                  | T2(T2-2/G)                   | 3.20       | 5.55     | 2.86       | -0.60              |
|                                  | T3(T3/G)                     | 2.20       | 4.66     | 1.40       | -0.30              |
|                                  | B1(B1-1/G)                   | 2.57       | 4.76     | 1.93       | -0.50              |
|                                  | B1(B1-2/G)                   | 1.90       | 4.09     | 1.25       | -0.49              |
|                                  | H1(H1/G)                     | 1.96       | 4.15     | 1.32       | -0.49              |
